# Supplementary material
Source: Springer Nature journal article supplement (https://www.springermedizin.de/resource/supplementary/12985_2010_878_MOESM3_ESM.pdf/9608648)

S14

Negative

1E5

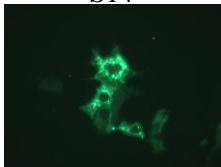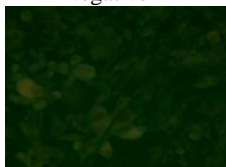

4E3

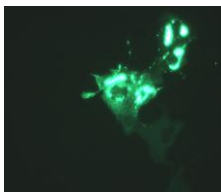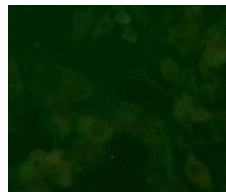

2F7

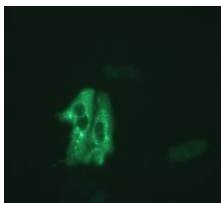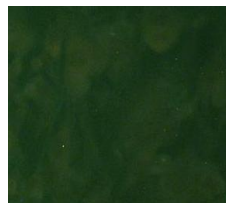

5D8

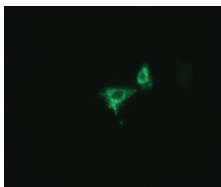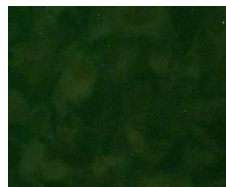

Supplement: MOESM3 [file 9608648]
